# Supplementary material
Source: PubMed Central journal article supplement (PMC1150891)
Supplement: 7600697s1.pdf [file 7600697s1.pdf]

Table 1. *ttx-4* mutants are defective in thermotaxis behavior

| Strain            | Fraction |     |        |     | Total number of animals |
|-------------------|----------|-----|--------|-----|-------------------------|
|                   | 20C      | 17C | 17/25C | 25C |                         |
| Wild type         | 80       | 20  | 13     | 7   | 120                     |
| <i>ttx-4(nj1)</i> | 3        | 0   | 0      | 151 | 154                     |
| <i>ttx-4(nj3)</i> | 5        | 1   | 0      | 74  | 80                      |
| <i>ttx-4(nj4)</i> | 22       | 10  | 0      | 88  | 120                     |

Animals were cultivated at 20°C. One animal was assayed per thermotaxis plate. The evaluation is shown in Materials and methods. Statistical analysis by a chi-squared test using 2 × 4 contingency table was performed in comparison between wild type strain and each of *ttx-4* strains. Each of *ttx-4* strains was different from wild type strain for thermotaxis ( $p < 0.005$ ).

Table 2. *ttx-4* mutants are defective in chemotaxis to NaCl

| Strain            | Fraction |                     |           | Total number of animals |
|-------------------|----------|---------------------|-----------|-------------------------|
|                   | Normal   | Partially defective | Defective |                         |
| Wild type         | 78       | 25                  | 7         | 110                     |
| <i>ttx-4(nj1)</i> | 4        | 35                  | 124       | 163                     |
| <i>ttx-4(nj3)</i> | 19       | 31                  | 63        | 113                     |
| <i>ttx-4(nj4)</i> | 38       | 34                  | 28        | 100                     |

Animals were cultivated at 20°C. One animal was assayed per chemotaxis plate. The evaluation is shown in Materials and methods. Statistical analysis by a chi-squared test using 2 × 3 contingency table was performed in comparison between wild type strain and each of *ttx-4* strains. Each of *ttx-4* strains was different from wild type strain for chemotaxis to NaCl ( $p < 0.005$ ).
